# Supplementary material
Source: Royal Society of Chemistry journal article supplement (doi:10.1039/d6tc00669h)
Supplement: d6tc00669h1.pdf [file d6tc00669h1.pdf]

## Supporting Information

### Magneto-Dielectric Synergy: One-Pot Synthesis of Fe<sub>3</sub>O<sub>4</sub> Nanoparticle Decorated Graphene Oxide for High Performance Electromagnetic Wave Absorption

Xuanxuan Huang<sup>a</sup>, Yaohan Hu<sup>a</sup>, Yi Luo<sup>a</sup>, Muwei Shu<sup>b</sup>, Zewen Yan<sup>b</sup>, Jiaxi Zhang<sup>b\*</sup>,  
Tao Sun<sup>a\*</sup>, Lei Yang<sup>a, c\*</sup>, Zhanjun Wu<sup>a</sup>

<sup>a</sup> School of Fiber Engineering and Equipment Technology, Jiangnan University, Lihu Road 1800, Wuxi, Jiangsu, 214122, PR China

<sup>b</sup> National Key Laboratory of Digital and Agile Aircraft Design, AVIC Chengdu Aircraft Design & Research Institute

<sup>c</sup> School of Mechanics and Aerospace Engineering, Dalian University of Technology, Dalian 116024, PR China

\*Corresponding authors email: zhangjx010@avic.com, suntao@jiangnan.edu.cn, yangl@jiangnan.edu.cn

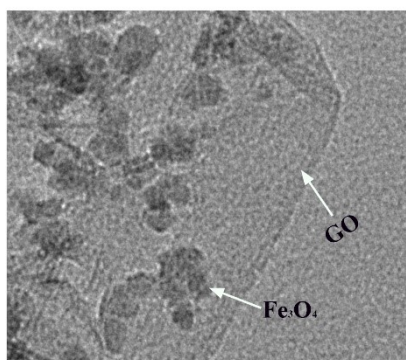

Fig.S1. TEM image of Fe<sub>3</sub>O<sub>4</sub>@GO70

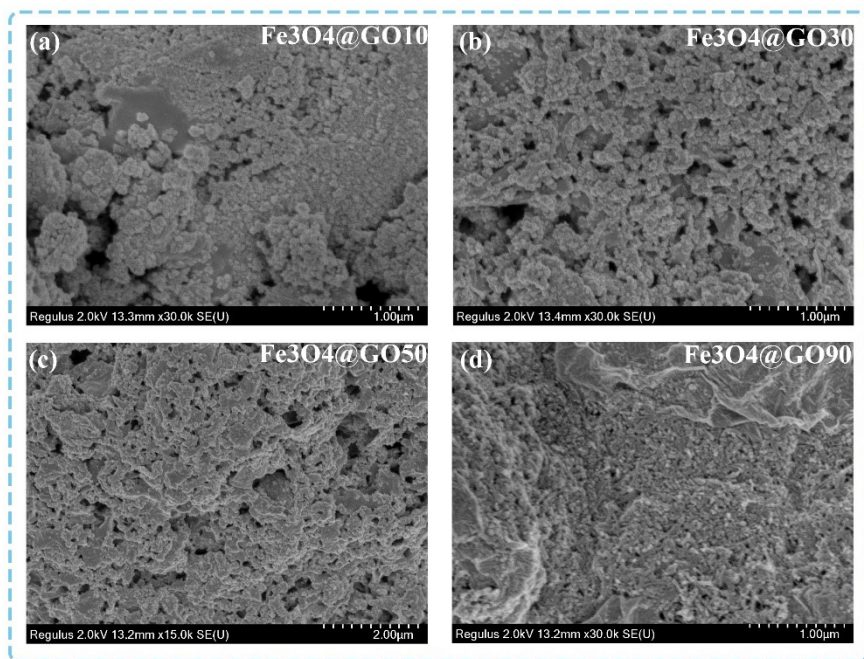

Fig.S2. SEM image of (a) Fe<sub>3</sub>O<sub>4</sub>@GO10, (b) Fe<sub>3</sub>O<sub>4</sub>@GO30, (c) Fe<sub>3</sub>O<sub>4</sub>@GO50, (d) Fe<sub>3</sub>O<sub>4</sub>@GO90.
